# Supplementary material
Source: ML conference proceedings conference paper supplement (https://openaccess.thecvf.com/content/CVPR2023/html/Cheng_WildLight_In-the-Wild_Inverse_CVPR_2023_paper.html)
Supplement: Supplementary file 1 [file Cheng_WildLight_In-the-Wild_Inverse_CVPR_2023_supplemental.pdf]

# WildLight: In-the-wild Inverse Rendering with a Flashlight (Appendix)

Ziang Cheng, Junxuan Li, Hongdong Li  
Australian National University

{ziang.cheng, junxuan.li, hongdong.li}@anu.edu.au

## 1. Principled BRDF formulation

Our intrinsic network outputs a spacial distribution of texture elements (textels)  $\Theta$  that parameterize the BRDF at that location. Since we are only interested in recovering opaque objects, we use a submodel of the original paper [1] without the refractive glass lobe. This parameterization can be expressed as:

$$\Theta = \{base\_color, roughness, clearcoat\_glossiness, subsurface, metallic, dielectric, clearcoat\} \in [0, 1]^9 \quad (1)$$

where  $base\_color \in [0, 1]^3$  is a 3D vector that defines the RGB base color of material, and all other terms are scalars in range  $[0, 1]$ . Since the camera and light angle are always aligned in a co-located setup, hereafter we denote them by a single direction  $\mathbf{h}$ .

The model is a linear combination of diffuse and specular lobes, defined as follows:

$$\begin{aligned} \rho(\mathbf{n}, \mathbf{h}; \Theta) = & (1 - metallic)\rho_{diffuse}(\mathbf{n}, \mathbf{h}; \Theta) + \\ & metallic\rho_{metallic}(\mathbf{n}, \mathbf{h}; \Theta) + \\ & 0.08 \times (1 - metallic)dielectric\rho_{dielectric}(\mathbf{n}, \mathbf{h}; \Theta) + \\ & 0.25 \times clearcoat\rho_{clearcoat}(\mathbf{n}, \mathbf{h}; \Theta) \end{aligned} \quad (2)$$

The diffuse component have two lobes: one for base diffuse and one for subsurface scattering

$$\rho_{diffuse} = (1 - subsurface)\rho_{base\_diffuse} + subsurface\rho_{subsurface} \quad (3)$$

where the two diffuse lobes are defined as

$$\rho_{base\_diffuse} = \frac{base\_color}{\pi} \left( 1 + (2roughness - 0.5)(1 - \mathbf{n}^\top \mathbf{h})^5 \right)^2 \quad (4)$$

and  $\rho_{subsurface}$  is defined as

$$\frac{1.25base\_color}{2\pi} \left( (1 + (roughness - 1)(1 - \mathbf{n}^\top \mathbf{h})^5)^2 \left( \frac{1}{\mathbf{n}^\top \mathbf{h}} - 1 \right) + 1 \right) \quad (5)$$

respectively.

The metallic and dielectric lobes share the same GGX distribution, and both can be factorized into three terms:

$$\rho_{specular} = \frac{DGF}{4(\mathbf{n}^\top \mathbf{h})^2} \quad (6)$$

where  $D$  and  $G$  are the microsurface distribution function and mask-shadowing term, respectively:

$$D = \frac{roughness^4}{\pi \left( (roughness^4 - 1)(\mathbf{n}^\top \mathbf{h})^2 + 1 \right)^2} \quad (7)$$

and

$$G = \frac{2}{\sqrt{1 + \frac{roughness^4(1 - (\mathbf{n}^\top \mathbf{h})^2)}{(\mathbf{n}^\top \mathbf{h})^2}} + 1}} \quad (8)$$

The only place where metallic and dielectric lobes differ is the Fresnel term  $F$ : the metallic lobe is chromatic while the dielectric lobe is not.

$$F_{metallic} = base\_color \quad (9)$$

$$F_{dielectric} = 1 \quad (10)$$

The clearcoat term can also be factorized similar to be-

$$\rho_{clearcoat} = \frac{D_c G_c F_c}{4(\mathbf{n}^\top \mathbf{h})^2} \quad (11)$$

where

$$D_c = \frac{roughness_c^2 - 1}{2\pi \log(roughness_c) (1 + (roughness_c^2 - 1)(\mathbf{n}^\top \mathbf{h})^2)} \quad (12)$$

$$G_c = \frac{2}{\sqrt{1 + \frac{0.25^2(1 - (\mathbf{n}^\top \mathbf{h})^2)}{(\mathbf{n}^\top \mathbf{h})^2}} + 1}} \quad (13)$$

$$F_c = 0.2 \quad (14)$$

Here the clearcoat roughness  $roughness_c$  is confined within range  $[0.001, 0.1]$  and is linearly parameterized by  $clearcoat\_glossiness$

$$roughness_c = 0.1 - 0.099clearcoat\_glossiness. \quad (15)$$

## 2. Surface-to-surface distance for geometry evaluation

We used a commutative mesh-to-mesh distance for evaluating the surface geometry produced from different method in Table 1. This distance metric is defined as follows:

$$D(S_1, S_2) = \frac{1}{2} \mathbb{E} (d(\mathbf{x}_1, S_2) + d(\mathbf{x}_2, S_1)) \quad (16)$$

where  $d$  is the point-to-manifold Euclidean distance,  $S_1$  and  $S_2$  are the visible surface regions, and  $\mathbf{x}_1$  and  $\mathbf{x}_2$  are two mutually independent random points uniformly sampled from  $S_1$  and  $S_2$  respectively. We compute the mean distance by repeatedly sampling  $\mathbf{x}_1, \mathbf{x}_2$  until the standard variation of sampling mean is no greater than  $10^{-5}$ , or until an excessive number of one million pairs of points have been sampled. For the median distance, we replace the expectation operator  $\mathbb{E}$  with the sample median.

## References

- [1] Brent Burley. Physically-based shading at disney. In *ACM SIGGRAPH Course Notes. Practical physically-based shading in film and game production.*, volume 2012, pages 1–7, 2012. 1
